# Supplementary material
Source: PubMed Central journal article supplement (PMC33134)

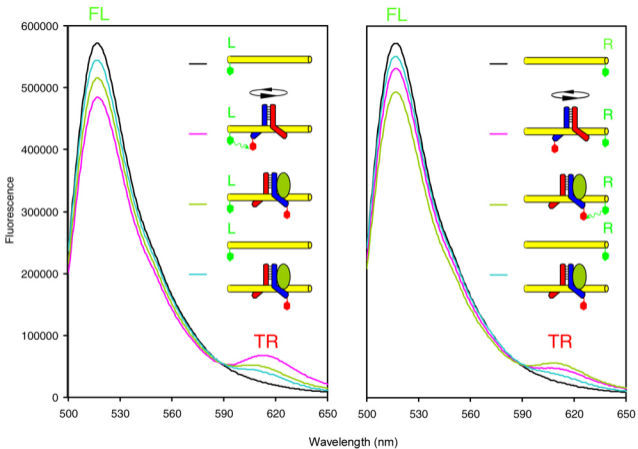

Supplement: pnas_98_9_4893__3.pdf [file pnas_98_9_4893__3.pdf]

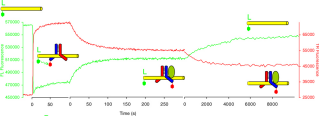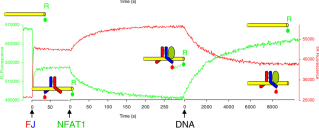

Supplement: pnas_98_9_4893__5.pdf [file pnas_98_9_4893__5.pdf]

**A**

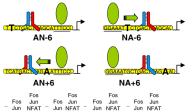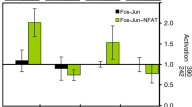

**B**

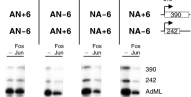

Supplement: pnas_98_9_4893__7.pdf [file pnas_98_9_4893__7.pdf]
